# Supplementary material for: Aggregation, binding, and dimerisation studies of a teicoplanin aglycone analogue (LY154989)Electronic supplementary information (ESI) available: tables of 1H NMR assignments. See http://www.rsc.org/suppdata/p2/b1/b108273f/
Source: Royal Society of Chemistry journal article supplement (doi:10.1039/b108273f), 2002-02-04
Supplement: b108273f.doc [file b108273f.doc]

#### Supplementary data

In the following tables of assignment, -CH protons are designated by the letter x, amide NH protons by the letter w, and amino acid side-chains numbered according to their position relative to the N-terminus (position 1). The benzylic proton of residue 6 is coded as z.

**1H NMR Assignment of LY154989 in DMSO-*d*6**

| **1H** | **** (ppm)** | **NOEs** |
| --- | --- | --- |
| 1b  1e  1f  2b  2e  2f  3b  3d  3f  4b  4f  5b  5f  6b  6e  6f  7d  7f  x1  x2  x3  x4  x5  x6  x7  z2  z2'  z6  w2  w3  w4  w5  w6  w7 | 6.60  7.68  7.14  7.23  7.18  7.70  6.33  6.38  6.41  5.69  5.07  7.28  6.81  7.66  7.21  7.48  6.38  6.31  4.73  4.89  5.24  5.60  4.58  4.15  4.46  3.33  2.85  5.05  7.44  7.67  7.62  8.64  6.76  8.28 | 1f, 3f  1f  1b, 1e, x1  z2, z2'  2f  2e, w2, z2'  x3  1b  4b, w4  4f  w7, x5, x6, z6  x5, x6, z6  6f  w5, w6, 6e  1f, w2  z2, z2'  3b  w5  5b, 6b, w7, x6, z6  5b, 6b, w7, z6  w7  2b, x2, z2'  2b, 2f, x2, z2  5b, 6b, w7, x5, x6  2f, x1  4b  6f, x4  6f  5b, x5, x6, x7, z6 |

Spectra were acquired at 500 MHz, 300 K and referenced to the residual protio-solvent peak of DMSO-d6 ( 2.52 ppm). The NOESY spectrum was acquired with a mixing time of 150 ms.

**1H NMR Assignment of LY154989 in 3:1 H2O:CD3**CN

| **1H** | **** (ppm)** | **NOEs** |
| --- | --- | --- |
| 1b  1e  1f  2b  2e  2f  3b  3d  3f  4b  4f  5b  5f  6b  6e  6f  7d  7f  x1  x2  x3  x4  x5  x6  x7  z2  z2'  z6  w2  w3  w4  w5  w6  w7 | 7.00  7.60  7.40  7.32  7.22  7.58  6.49  6.63  6.23  5.28  5.68  6.95  6.98  7.60  7.16  7.47  6.52  6.44  5.41  4.95  5.50  5.50  4.35  3.99  4.55  3.36  3.10  5.47  7.55  6.90  6.52  8.49  7.26  8.32 | 3f  1f  1e, x1  z2, z2'  2f  2e, z2'  3f  1b, 3b, w3, w4  w5  x4  w7, x5, x6  x6, z6  6f  6e, w6  7f  7d  1f, w2  z2, z2'  w3  4f, w5  5b, x6  5b, 6b, w7, x5, z6  2b, x2, z2'  2b, 2f, x2, z2  6b, w7, x6  w3, x1  3f, w2, x3  3f  4b, x4  6f  5b, x6, z6 |

Spectra were acquired at 500 MHz, 300 K and referenced to internal TSP ( 0.00 ppm). The NOESY spectrum was acquired with a mixing time of 150 ms.

**1H NMR Assignment of LY154989/Ac2-KDADA Complex in 9:1 H2O:D2**O

| **1H** | **** (ppm)** | **NOEs** |
| --- | --- | --- |
| 1b  1e  1f  2b  2e  2f  3b  3d  3f  4b  4f  5b  5f  6b  7d  7f  x1  x2  x3  x4  x5  x6  x7  z2  z2'  z6  w2  w3  w4  w5  w6  w7  Ala3Me  Ala3**  Ala3NH  Ala2Me  Ala2**  Ala2NH  Lys1**  Lys1**  Lys1**  Lys1**  Lys1**  Lys1**NH  Lys1**NH  Lys1**Ac  Lys1**Ac | 6.92  7.28  7.17  7.30  7.13  7.44  6.60  6.57  6.49  5.63  5.19  7.64  7.05  7.02  6.52  6.49  5.19  5.22  5.65  5.83  4.64  4.55  4.60  3.46  3.07  5.37  12.29  9.34  9.02  8.98  7.58  9.03  0.56  3.94  7.78  1.15  4.45  7.95  4.33  1.59  1.39  1.64  3.25  9.00  7.94  1.98  2.02 | 3f, x1  x1, Ala3**  x1, Ala3**  x3, z2, z2'  Ala3Me  w2, x1, z2, z2', Ala3Me  x3  1b, w3  4f, w4, Ala3Me  4b, w5, x4  5f, w7, x5, x6, z6, Ala2**, Ala2Me  5b  x6, z6, Lys1**Ac  Ala2Me  Lys1**  1b, 1e, 1f, 2f, w2  w3, z2, z2'  3b, 2b, w3  4f, w5  5b, w7  5b, 6b, w6, w7, z6  2b, 2f, x2, z2'  2b, 2f, x2, z2  5b, 6b, w7, x6, Lys1**Ac  2f, x1  3f, x2, x3  4b  4f, x4  x6  5b, x6, x5, z6  2e, 2f, 4b, Ala3**, Ala3NH  1e, 1f, Ala3Me, Ala3NH  Ala3Me, Ala3**, Ala2Me  5b, 7d, Ala3NH, Ala2NH  5b  Ala2Me  Lys1**, Lys1**NH  7f, Lys1**, Lys1**NH  Lys1**  Lys1**  Lys1**, Lys1**, Lys1**Ac  6b, z6, Lys1**NH |

Spectra were acquired at 500 MHz, 300 K and referenced to internal TSP ( 0.00 ppm). The NOESY spectrum was acquired with a mixing time of 150 ms. The ligand amino acids are numbered from the N-terminus to the C-terminus. Resonances due to unbound ligand have not been included.
